# Supplementary material
Source: PubMed Central journal article supplement (PMC4306721)
Supplement: supp_kfu240_Supplementary_information_for_kfu240.pdf [file supp_kfu240_Supplementary_information_for_kfu240.pdf]

1 **SUPPLEMENTARY INFORMATION for:**

2 **Role of Pregnane X Receptor and Aryl Hydrocarbon Receptor in Transcriptional Regulation**  
3 **of *pxr*, *CYP2*, and *CYP3* Genes in Developing Zebrafish**

4

5 Akira Kubota<sup>\*</sup>, Jared V. Goldstone, Benjamin Lemaire, Matthew Takata, Bruce R. Woodin, John J.  
6 Stegeman<sup>†</sup>

7

8 Biology Department, Woods Hole Oceanographic Institution, Woods Hole, Massachusetts 02543,  
9 USA (akubota@obihiro.ac.jp; jgoldstone@whoi.edu; benjamin.lemaire@live.be;  
10 matakata@students.nwc.edu; bwoodin@whoi.edu; jstegeman@whoi.edu)

11

12 <sup>†</sup>Corresponding author: John J. Stegeman (jstegeman@whoi.edu)

13 Biology Department,

14 Woods Hole Oceanographic Institution,

15 Woods Hole, MA 02543, USA

16 Phone: 508-289-2320

17 Fax: 508-457-2169

18

19 <sup>\*</sup>Present address : Diagnostic Center for Animal Health and Food Safety, Obihiro University of  
20 Agriculture and Veterinary Medicine, Obihiro, Hokkaido 080-8555, Japan

21

22 Running title: *pxr* and *CYP* genes in developing zebrafish

Table S1. Summary for *pxr*, *ahr2* and *CYP* gene expression in 72 hpf zebrafish eleutheroembryos treated with a morpholino blocking *pxr* translation (Pxr), a control morpholino (Ctl), or no morpholino (No), and subsequent exposure to pregnenolone (3  $\mu$ M) or the vehicle DMSO (0.1%)

| Exposure     | Morpholino | <i>pxr</i>      |     | <i>ahr2</i>     |     | <i>CYP1A</i>    |  | <i>CYP2AA1</i>  |     | <i>CYP2AA12</i> |   | <i>CYP3A65</i>  |    | <i>CYP3C1</i>   |   |
|--------------|------------|-----------------|-----|-----------------|-----|-----------------|--|-----------------|-----|-----------------|---|-----------------|----|-----------------|---|
| DMSO         | No         | 0.93 $\pm$ 0.14 |     | 0.90 $\pm$ 0.11 |     | 1.1 $\pm$ 0.31  |  | 0.91 $\pm$ 0.09 |     | 0.93 $\pm$ 0.16 |   | 1.1 $\pm$ 0.22  |    | 0.97 $\pm$ 0.09 |   |
|              | Ctl        | 1.0             |     | 1.0             |     | 1.0             |  | 1.0             |     | 1.0             |   | 1.0             |    | 1.0             |   |
|              | Pxr        | 0.53 $\pm$ 0.08 |     | 0.75 $\pm$ 0.11 |     | 0.77 $\pm$ 0.14 |  | 0.76 $\pm$ 0.31 |     | 1.1 $\pm$ 0.22  |   | 0.69 $\pm$ 0.18 |    | 0.98 $\pm$ 0.23 |   |
| Pregnenolone | No         | 2.5 $\pm$ 0.59  |     | 1.2 $\pm$ 0.1   |     | 1.7 $\pm$ 0.42  |  | 1.2 $\pm$ 0.19  |     | 1.3 $\pm$ 0.16  |   | 2.7 $\pm$ 0.73  |    | 1.5 $\pm$ 0.23  |   |
|              | Ctl        | 3.0 $\pm$ 0.84  |     | 1.3 $\pm$ 0.28  |     | 1.2 $\pm$ 0.15  |  | 1.7 $\pm$ 0.44  |     | 1.7 $\pm$ 0.63  |   | 2.8 $\pm$ 0.67  |    | 1.5 $\pm$ 0.44  |   |
|              | Pxr        | 1.3 $\pm$ 0.43  | *** | 0.72 $\pm$ 0.08 | *** | 0.86 $\pm$ 0.34 |  | 0.64 $\pm$ 0.42 | *** | 1.1 $\pm$ 0.19  | * | 1.4 $\pm$ 0.28  | ** | 1.1 $\pm$ 0.21  | * |

Data are normalized to the expression levels in the Ctl-MO + DMSO group and are shown as mean  $\pm$  SD from four independent experiments with each determination made in at least duplicate. Significant decreases in the PN induction of expression of these genes were observed in the Pxr-MO group relative to the Ctl-MO group (\*  $p < 0.01$ , \*\*  $p < 0.01$ , \*\*\*  $p < 0.001$ ). Note that there was no statistical difference in transcript levels of any of the genes examined between vehicle control group and Pxr-MO + pregnenolone group.

Table S2. Summary for *pxr*, *ahr2* and *CYP* gene expression in 96 hpf zebrafish eleutheroembryos treated with a morpholino blocking *ahr2* translation (Ahr2), a control morpholino (Ctl), or no morpholino (No), and subsequent exposure to PCB126 (5 nM) or the vehicle DMSO (0.02%)

| Exposure | Morpholino | <i>pxr</i> | <i>ahr2</i> | <i>CYP1A</i> | <i>CYP2A12</i> | <i>CYP3A65</i> | <i>CYP3C1</i> |
|----------|------------|------------|-------------|--------------|----------------|----------------|---------------|
| DMSO     | No         | 0.81       | 1.6         | 8.7          | 1.0            | 0.98           | 0.83          |
|          | Ctl        | 1.0        | 1.0         | 1.0          | 1.0            | 1.0            | 1.0           |
|          | Ahr2       | 0.78       | 2.2         | 0.63         | 0.93           | 0.88           | 0.96          |
| PCB126   | No         | 1.8        | 2.7         | 83           | 2.3            | 2.9            | 1.1           |
|          | Ctl        | 1.9        | 2.8         | 140          | 2.8            | 4.5            | 1.4           |
|          | Ahr2       | 1.1        | 3.0         | 18           | 1.5            | 1.6            | 0.73          |

Data are normalized to the expression levels in the Ctl-MO + DMSO group and are shown as mean of two replicates in a single experiment. cDNA samples collected in our previous studies (Jonsson et al., 2012) were used for quantification of *pxr*, *ahr2* and *CYP* genes. Note that the Ahr2-MO studies were repeated and transcript levels of two genes that were prominently induced by PCB126 in the first experiment, *CYP2A12* and *CYP3A65*, were quantified. Induction of these two genes by PCB126 was blocked to the levels in the Ctl-MO + DMSO group, with significant reduction as compared to the levels in the Ctl-MO + PCB126 group (see Fig. 6).

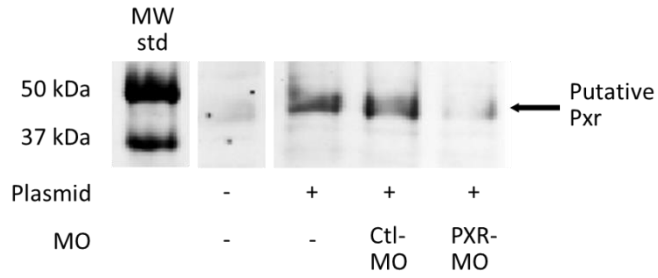

24

25 Fig. S1. Efficacy and specificity of morpholino (MO) against *pxr* assessed by *in vitro*

26 transcription/translation system. Protein of zebrafish Pxr was synthesized by *in vitro*

27 transcription/translation system with or without Pxr-MO or placebocontrol morpholino (Ctl-MO).

28 The putative Pxr band was determined from the calculated molecular weight and the mobility of the

29 *in vitro* synthesized protein relative to the molecular weight marker proteins, and is indicated by the

30 arrow in the right margin.

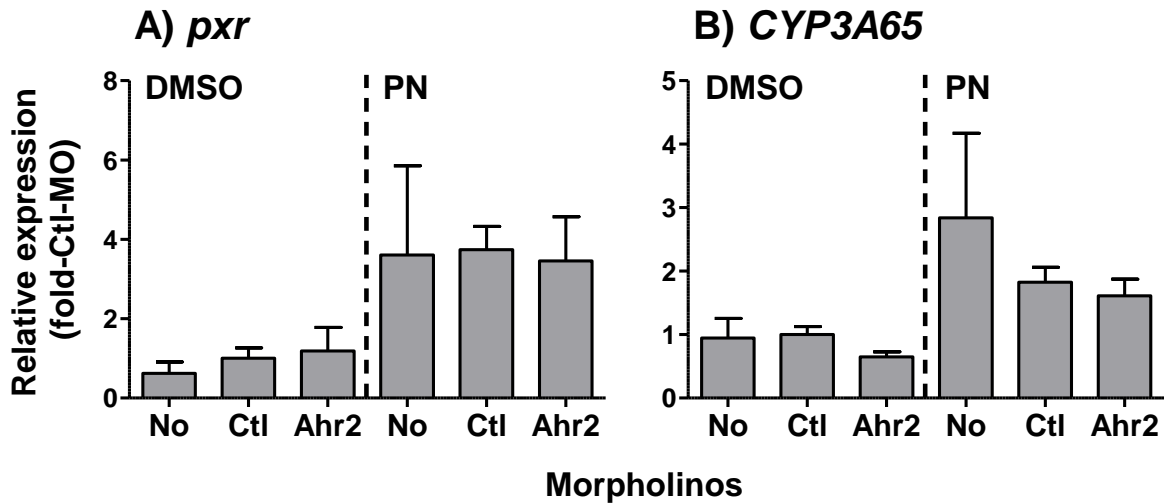

31  
 32 Fig. S2. Effect of Ahr2 morpholino (Ahr2-MO) treatment on the mRNA expression of *pxr* and  
 33 *CYP3A65* in 72 hpf eleutheroembryos exposed to pregnenolone (PN; 3  $\mu$ M) or vehicle (0.1%  
 34 DMSO). Data are normalized to the expression levels in the control morpholino (Ctl-MO) + DMSO  
 35 group and are shown as mean+SD of four replicates after combining data from two independent  
 36 experiments. No significant suppression of PN induction of *pxr* or *CYP3A65* was observed in the  
 37 Ahr2-MO group relative to the Ctl-MO group ( $p > 0.05$ ), when statistical analysis was conducted by  
 38 one-way ANOVA followed by Dunnett's multiple comparison test ( $p > 0.05$ ).

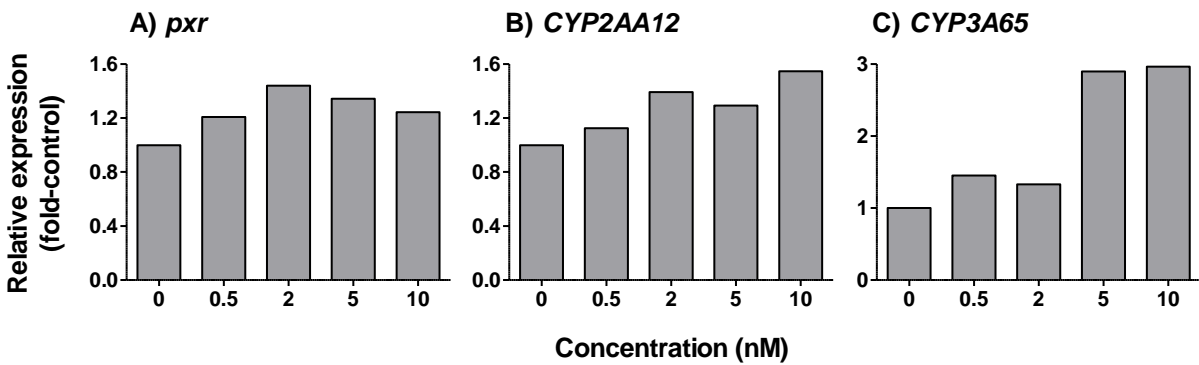

39  
 40 Fig. S3. Dose-response relationships for effects of PCB126 on the mRNA expression of *pxr* (A),  
 41 *CYP2AA12* (B) and *CYP3A65* (C) in developing zebrafish (determined at 72 hpf). Embryos were  
 42 exposed to carrier (0.02% DMSO) or differing concentrations of PCB126 (0.5, 2, 5 or 10 nM) for 24  
 43 h starting at 24 hpf. At 72 hpf, eleutheroembryos were sampled for quantitative real time PCR  
 44 analysis. Relative expression (fold-control) was calculated by  $E^{-\Delta\Delta C_t}$  using *ef1a* as a reference gene  
 45 (Jonsson et al., 2007, 2012).  $N = 2$  from a single experiment.

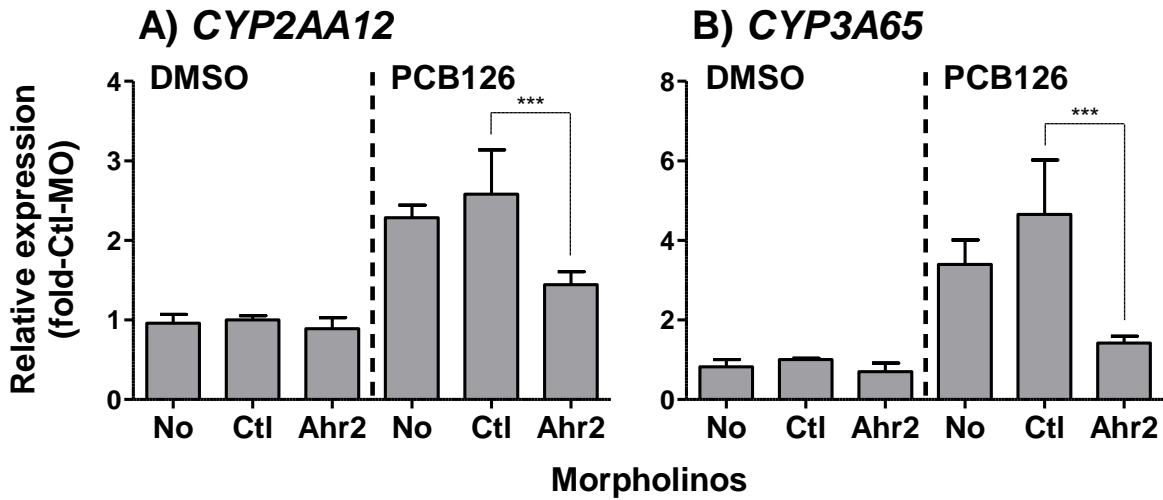

46

47 Fig. S4. Effect of Ahr2 morpholino (Ahr2-MO) treatment on the mRNA expression of *CYP2AA12*  
 48 and *CYP3A65* in 96 hpf eleutheroembryos exposed to PCB126 (5 nM) or vehicle (0.02% DMSO).  
 49 Data are normalized to the expression levels in the control morpholino (Ctl-MO) + DMSO group  
 50 and are shown as mean+SD of four replicates after combining data from two independent  
 51 experiments. Significant decreases in the PCB126 induction of expression of these genes were  
 52 observed in the Ahr2-MO group relative to the Ctl-MO group (\*\* $p < 0.001$ ).
